# Supplementary material for: Cryptic Diversity of Black Band Disease Cyanobacteria in Siderastrea siderea Corals Revealed by Chemical Ecology and Comparative Genome-Resolved Metagenomics
Source: MDPI journal article supplement (doi:10.3390/md21020076), 2023-01-22
Supplement: s1 [file s1]

## Supplementary Materials for “Cryptic Diversity of Black Band Disease Cyanobacteria in *Siderastrea siderea* Corals Revealed by Chemical Ecology and Comparative Genome-Resolved Metagenomics”

Julie L. Meyer 1,\*, Sarath P. Gunasekera 2, Anya L. Brown 3,4, Yousong Ding 5, Stephanie Miller 1, Max Teplitski 1,2 and Valerie J. Paul 2

1 Department of Soil, Water, and Ecosystem Sciences, University of Florida, Gainesville, FL 32610, USA

2 Smithsonian Marine Station, Ft. Pierce, FL 34949, USA

3 School of Natural Resources and Environment, University of Florida, Gainesville, FL 32603, USA;

4 Department of Evolution and Ecology & Bodega Marine Lab, University of California, Bodega Bay, CA 94923, USA

5 Department of Medicinal Chemistry & Center for Natural Products, Drug Discovery and Development, University of Florida, Gainesville, FL 32603, USA

\* Correspondence: juliemeyer@ufl.edu

### General Experimental Procedures.

The optical rotations were recorded on a Jasco P2000 polarimeter. UV spectrophotometric data was acquired on a Shimadzu PharmaSpec UV-visible spectrophotometer. NMR data were collected on a JEOL ECA-600 spectrometer operating at 600.17 MHz for  $^1\text{H}$  and 150.9 MHz for  $^{13}\text{C}$ .  $^1\text{H}$  NMR chemical shifts (referenced to residual  $\text{CD}_3\text{OD}$  at  $\delta$  3.30) were assigned using a combination of data from 2D DQF COSY and multiplicity-edited HSQC experiments. The edited-HSQC experiment was optimized for  $J_{\text{CH}} = 140$  Hz and the HMBC experiment was optimized for  $^2J_{\text{CH}} = 8$  Hz.  $^{13}\text{C}$  NMR chemical shifts (referenced to  $\text{CD}_3\text{CN}$  observed at  $\delta$  118.2 and  $\text{CD}_3\text{OD}$  at  $\delta$  49.0) were assigned on the basis of multiplicity-edited HSQC experiments. The LC-MS data were obtained on LC electrospray ionization MS system with a LTQ Advantage Max spectrometer (Thermo Finnigan, Waltham, MA, USA). The HRMS data was obtained using an Agilent 6210 LC-TOF mass spectrometer equipped with an APCI/ESI multimode ion source detector at the Mass Spectrometer Facility at the University of California,

Riverside, California. Varian BondElut octadecyl (C<sub>18</sub>) were used for column chromatography. All solvents used were of HPLC grade (Fisher Scientific).

**Collection, Extraction, and Isolation** The cyanobacterial mats from the black-band disease zones from several samples of coral species of *Siderastrea siderea* growing near South Water Cay, Belize were collected on July, 2014 and bulked for this study. This collection was freeze dried to give a dry weight of 1.96 g. This dry material was extracted repeatedly with MeOH.

Concentration of the combined extracts by rotary evaporation at 45 °C under reduced pressure gave 173 mg of the MeOH soluble fraction. The LRESI MS analysis of the MeOH extract as shown in Figure S1 indicated the presence of naturally occurring unstable looekeyolide C ( $m/z = 720$ ) and traces of the relatively stable oxidized product looekeyolide D ( $m/z = 736$ ). The MeOH extract (0.173 g) was chromatographed on a column of C<sub>18</sub> (3 g) using MeOH–H<sub>2</sub>O step gradient system to give five sub-fractions. The LRESI MS analysis of the fraction 3, as shown in Figure S4, indicated the presence of less naturally occurring unstable looekeyolide C ( $m/z = 720$ ) and more of its relatively stable oxidized product looekeyolide D ( $m/z = 736$ ) indicating the oxidation during the chromatography procedure. The sub-fraction 3 (0.002 g), eluted with MeOH–%02 H<sub>2</sub>O was further separated by reversed-phase HPLC (semi-prep 250 x 10 mm, 5  $\mu$ m, RP-18, flow 3.0 mL/min) using MeOH–%02 H<sub>2</sub>O to give 0.6 mg of looekeyolide D ( $t_R = 10.3$  min, yield, 0.03% dry wt). Looekeyolide C was not isolated and assumed to be oxidized during the HPLC separation.

A second batch of cyanobacterial mat from the black-band disease zones of *Siderestrea* growing in Curlew Cay, Belize was collected on August 6, 2018. The freeze-dried material 0.482 g was extracted with EtOAc–%05 MeOH saturated with helium gas. Concentration of the extract as above furnished 0.029 g of EtOAc–MeOH soluble fraction. The LRESI MS analysis of

Meyer *et al.*, Cryptic diversity of Black Band Disease cyanobacteria in *Siderastrea siderea* corals revealed by chemical ecology and comparative genome-resolved metagenomics

the EtOAc–MeOH soluble fraction as shown in Figure S2 indicated the presence of relatively equal amounts of naturally occurring unstable looekeyolide C ( $m/z = 720$ ) and its relatively stable oxidized product looekeyolide D ( $m/z = 736$ ). Reversed-phase  $C_{18}$  column chromatography of the extract followed by reversed-phase HPLC under the same conditions gave 0.3 mg of looekeyolide D ( $t_R = 10.3$  min, yield, 0.06% dry wt). The unstable looekeyolide C oxidized to looekeyolide D during the separation procedures.

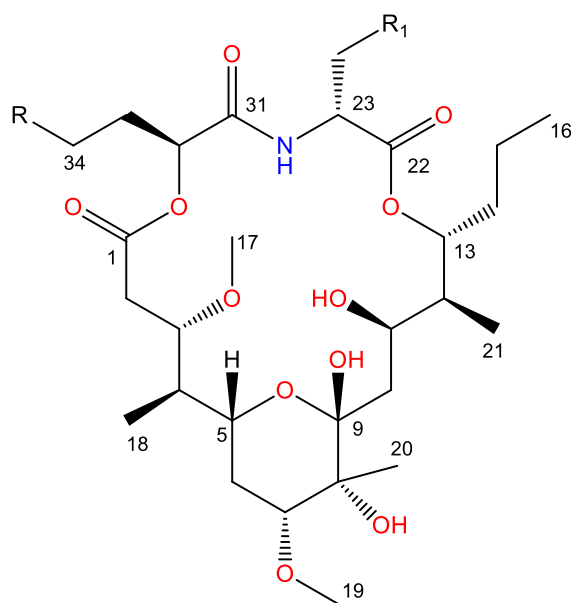

Looekeyolide A (**1**), R = S-CH<sub>3</sub>, R<sub>1</sub> = CH(CH<sub>3</sub>)<sub>2</sub>  
 Looekeyolide B (**2**), R = S(O)-CH<sub>3</sub>, R<sub>1</sub> = CH(CH<sub>3</sub>)<sub>2</sub>  
 Looekeyolide C (**3**), R = S-CH<sub>3</sub>, R<sub>1</sub> = Ph  
 Looekeyolide D (**4**), R = S(O)-CH<sub>3</sub>, R<sub>1</sub> = Ph

Gunasekera SP, Meyer JL, Ding Y, Abboud KA, Luo D, Cambell JE, Angerhofer A, Goodsell JL, Raymundo LJ, Lui J, Ye T, Luesch H, Teplitski M, Paul VJ. Chemical and metagenomic studies of the lethal black band disease of corals reveal two broadly distributed, redox-sensitive mixed polyketide/peptide macrocycles. *J. Nat. Prod.* 2019; **82**: 111–121.

Meyer *et al.*, Cryptic diversity of Black Band Disease cyanobacteria in *Siderastrea siderea* corals revealed by chemical ecology and comparative genome-resolved metagenomics

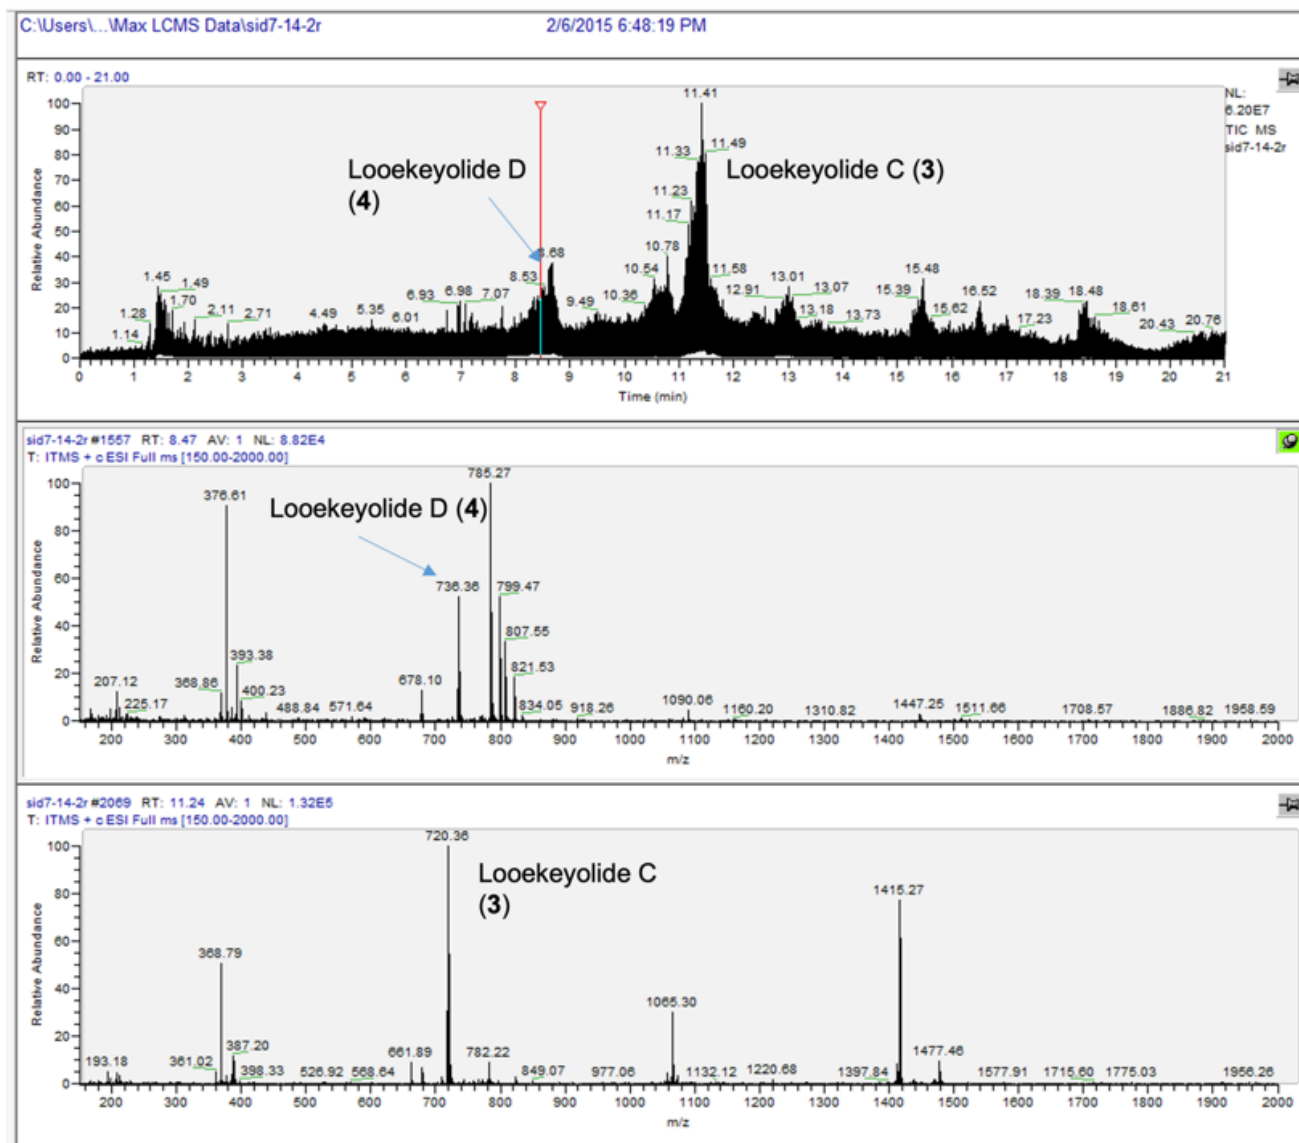

**Figure S1:** LRLC-MS data showing the presence of looekeyolides C and D in the MeOH extract of 2014 Belize collection.

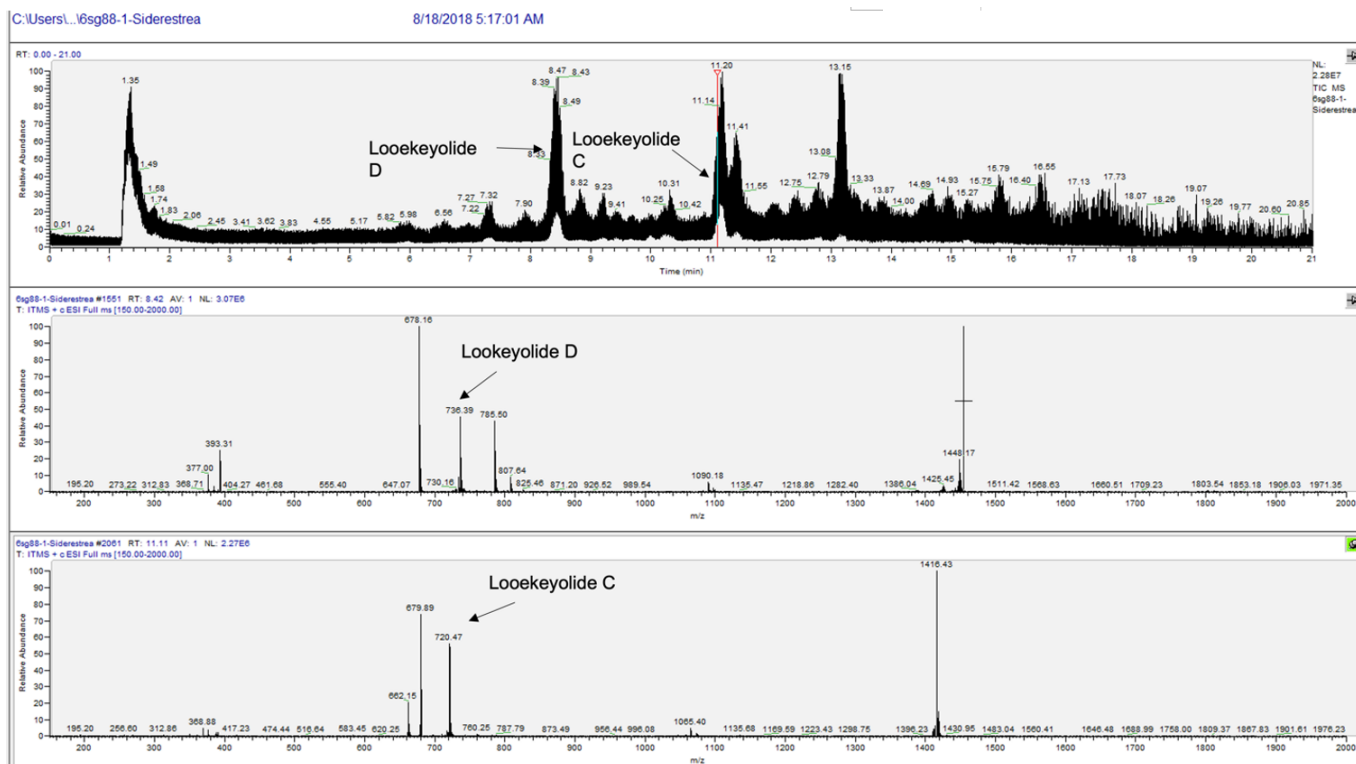

**Figure S2:** LRLC-MS data showing the presence of lookeyolides C and D in the EtOAc-MeOH (1:1) extract of 2018 Belize collection.

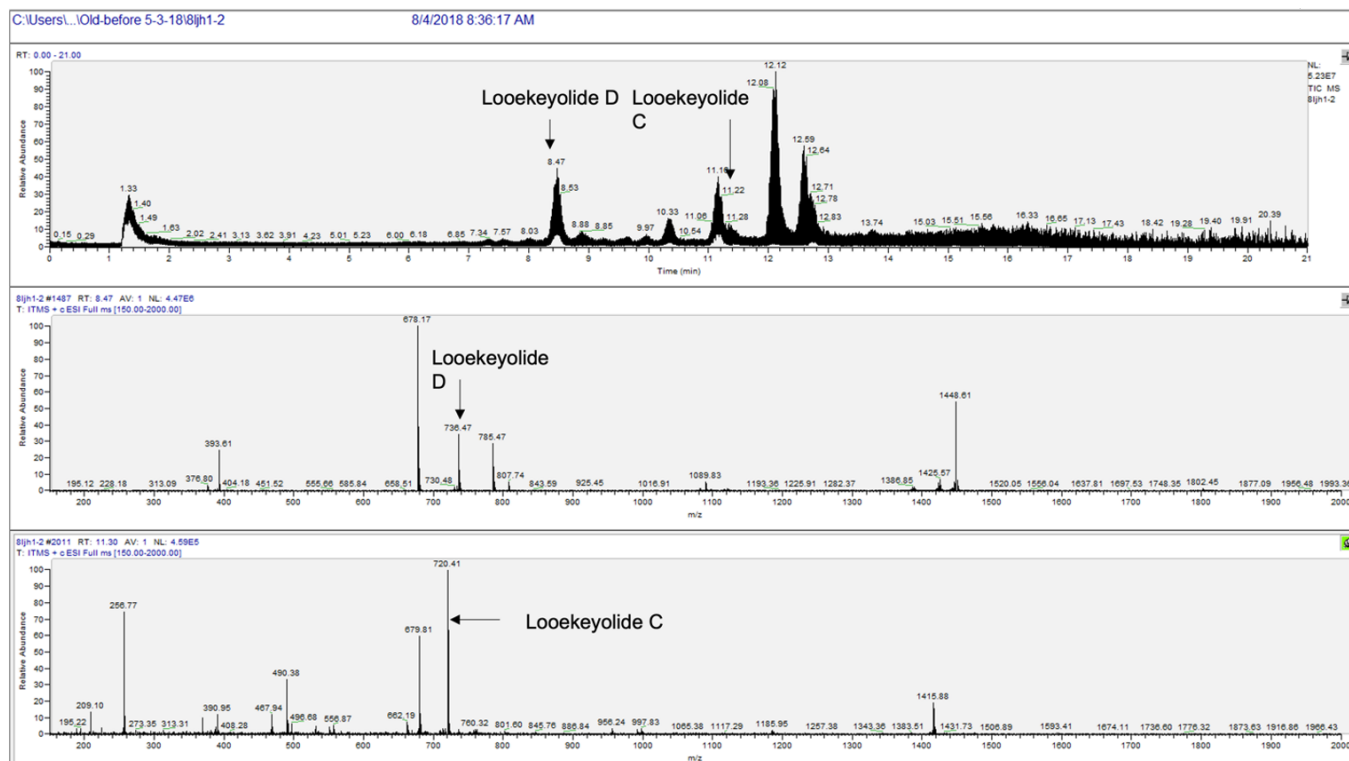

**Figure S3:** LRLC-MS data showing the presence of looekeyolides C and D in the EtOAc-MeOH (1:1) extract of 2018 Fort Lauderdale, Florida collection.

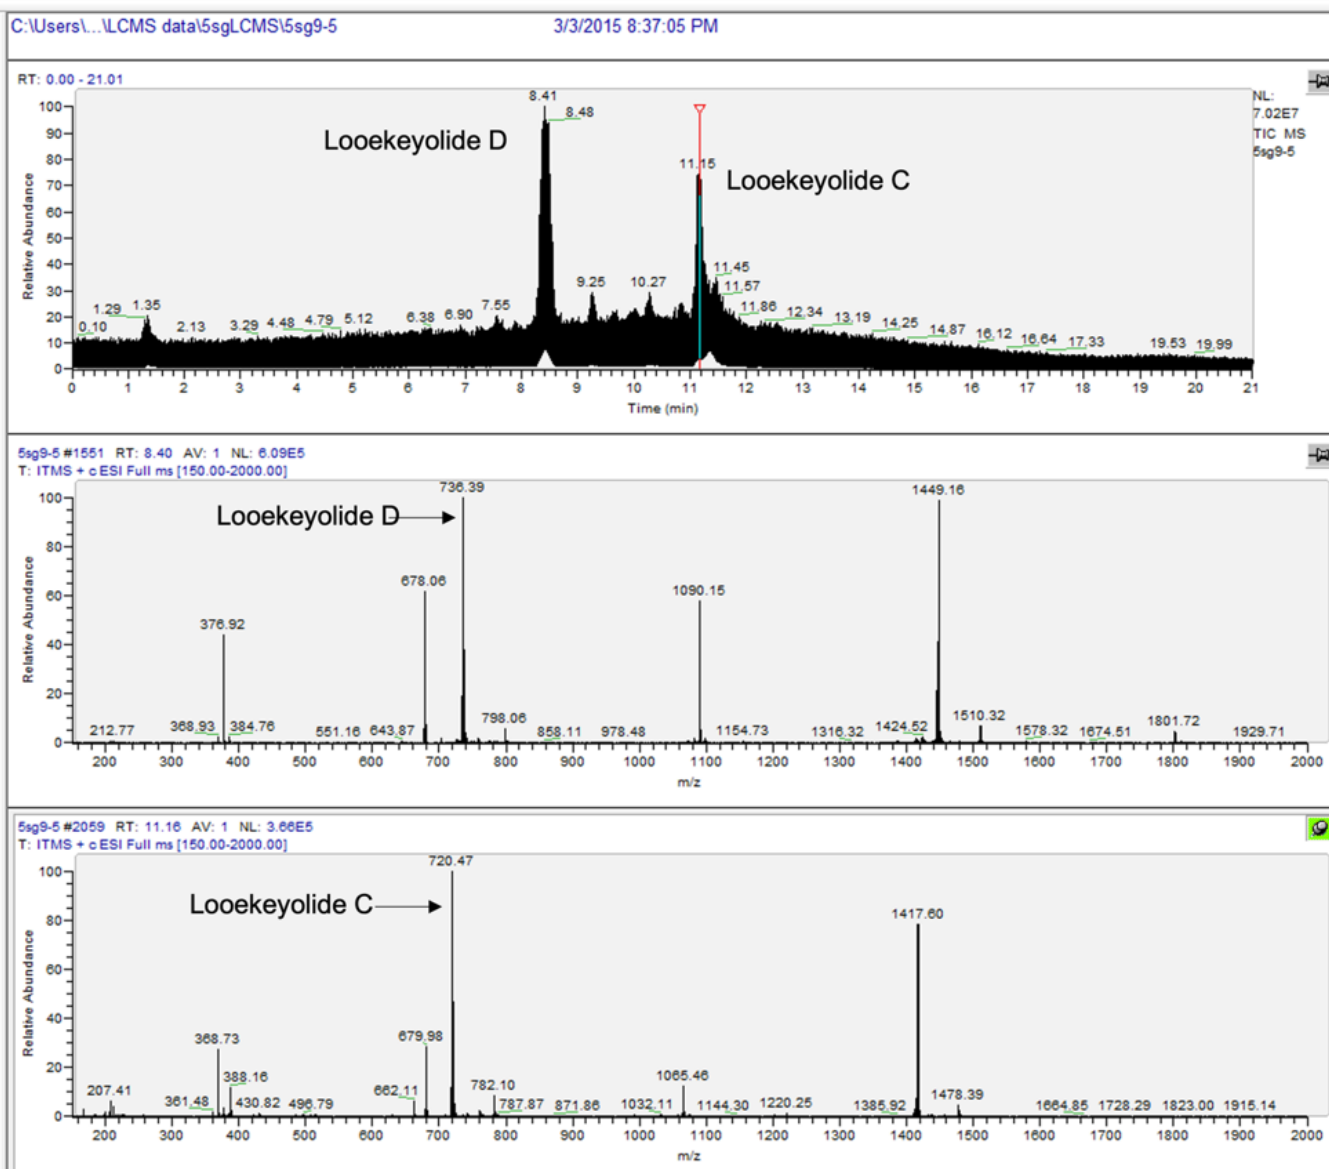

**Figure S4:** LRLC-MS data showing the presence of lookeyolides C and D in fraction 3 of the 2014 Belize collection.

|                                                                                                                  |            |
|------------------------------------------------------------------------------------------------------------------|------------|
| Contents:                                                                                                        | Page #     |
| <b>Figure S5:</b> $^1\text{H}$ NMR (600 MHz, $\text{CD}_3\text{OD}$ ) spectrum of looekeyolide D ( <b>4</b> )    | <b>S9</b>  |
| <b>Figure S6:</b> $^{13}\text{C}$ NMR (151 MHz, $\text{CD}_3\text{OD}$ ) spectrum of looekeyolide D ( <b>4</b> ) | <b>S10</b> |
| <b>Figure S7:</b> DQF-COSY NMR (600 MHz, $\text{CD}_3\text{OD}$ ) spectrum of looekeyolide D ( <b>4</b> )        | <b>S11</b> |
| <b>Figure S8:</b> HSQC NMR (600 MHz, $\text{CD}_3\text{OD}$ ) spectrum of looekeyolide D ( <b>4</b> )            | <b>S12</b> |
| <b>Figure S9:</b> HMBC NMR (600 MHz, $\text{CD}_3\text{OD}$ ) spectrum of looekeyolide D ( <b>4</b> )            | <b>S13</b> |
| <b>Figure S10:</b> 2D-NOESY NMR (600 MHz, $\text{CD}_3\text{OD}$ ) spectrum of looekeyolide D ( <b>4</b> )       | <b>S14</b> |

**Figure S5:**  $^1\text{H}$  NMR (600 MHz,  $\text{CD}_3\text{OD}$ ) spectrum of lookeyolide D (**4**)

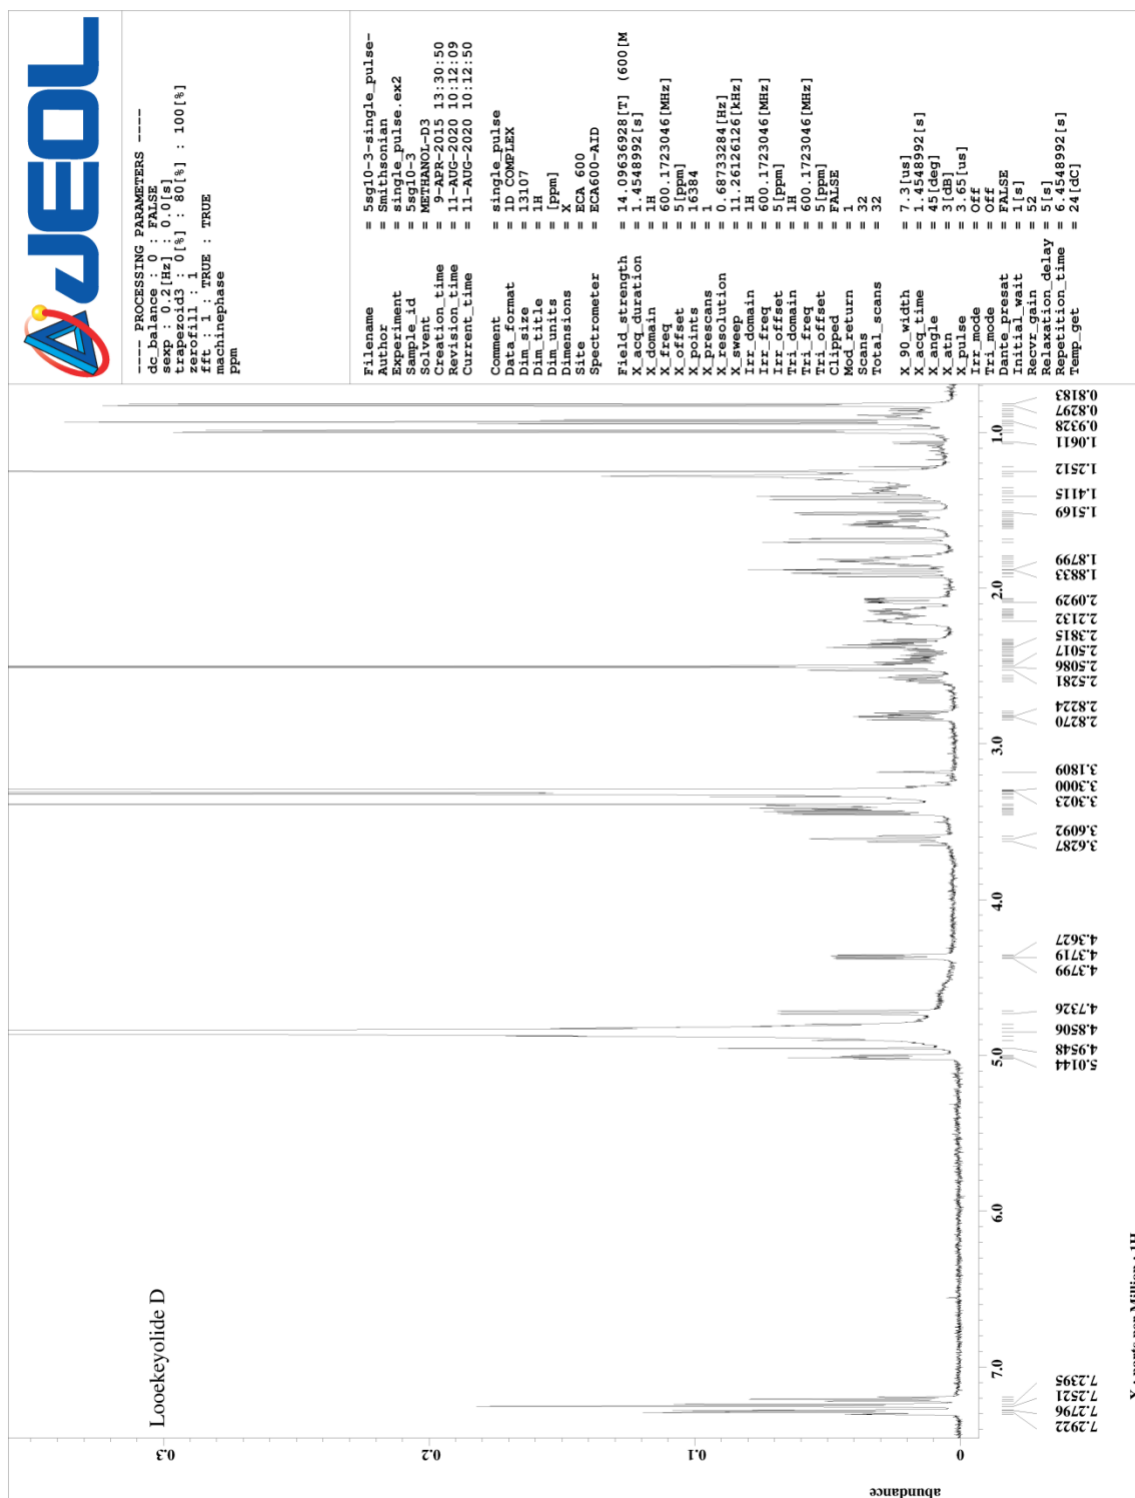

**Figure S6:**  $^{13}\text{C}$  NMR (151 MHz,  $\text{CD}_3\text{OD}$ ) spectrum of lookeyolide D (**4**)

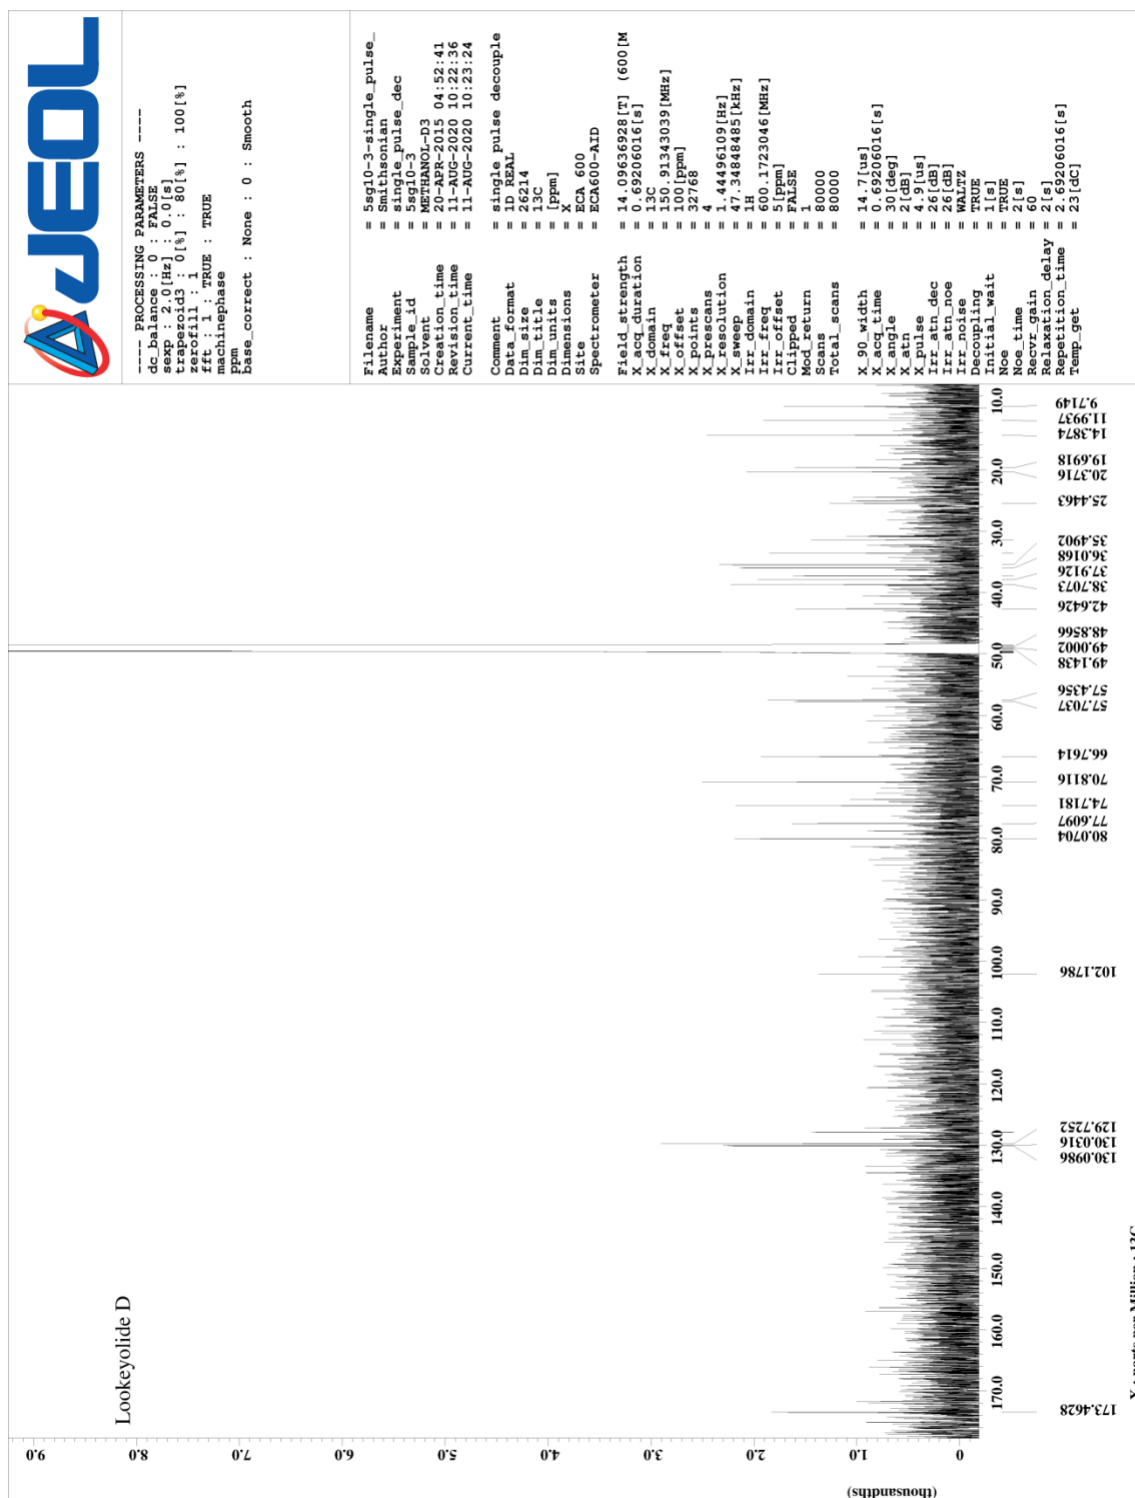

**Figure S7:** DQF-COSY NMR (600 MHz, CD<sub>3</sub>OD) spectrum of looekeyolide D (**4**)

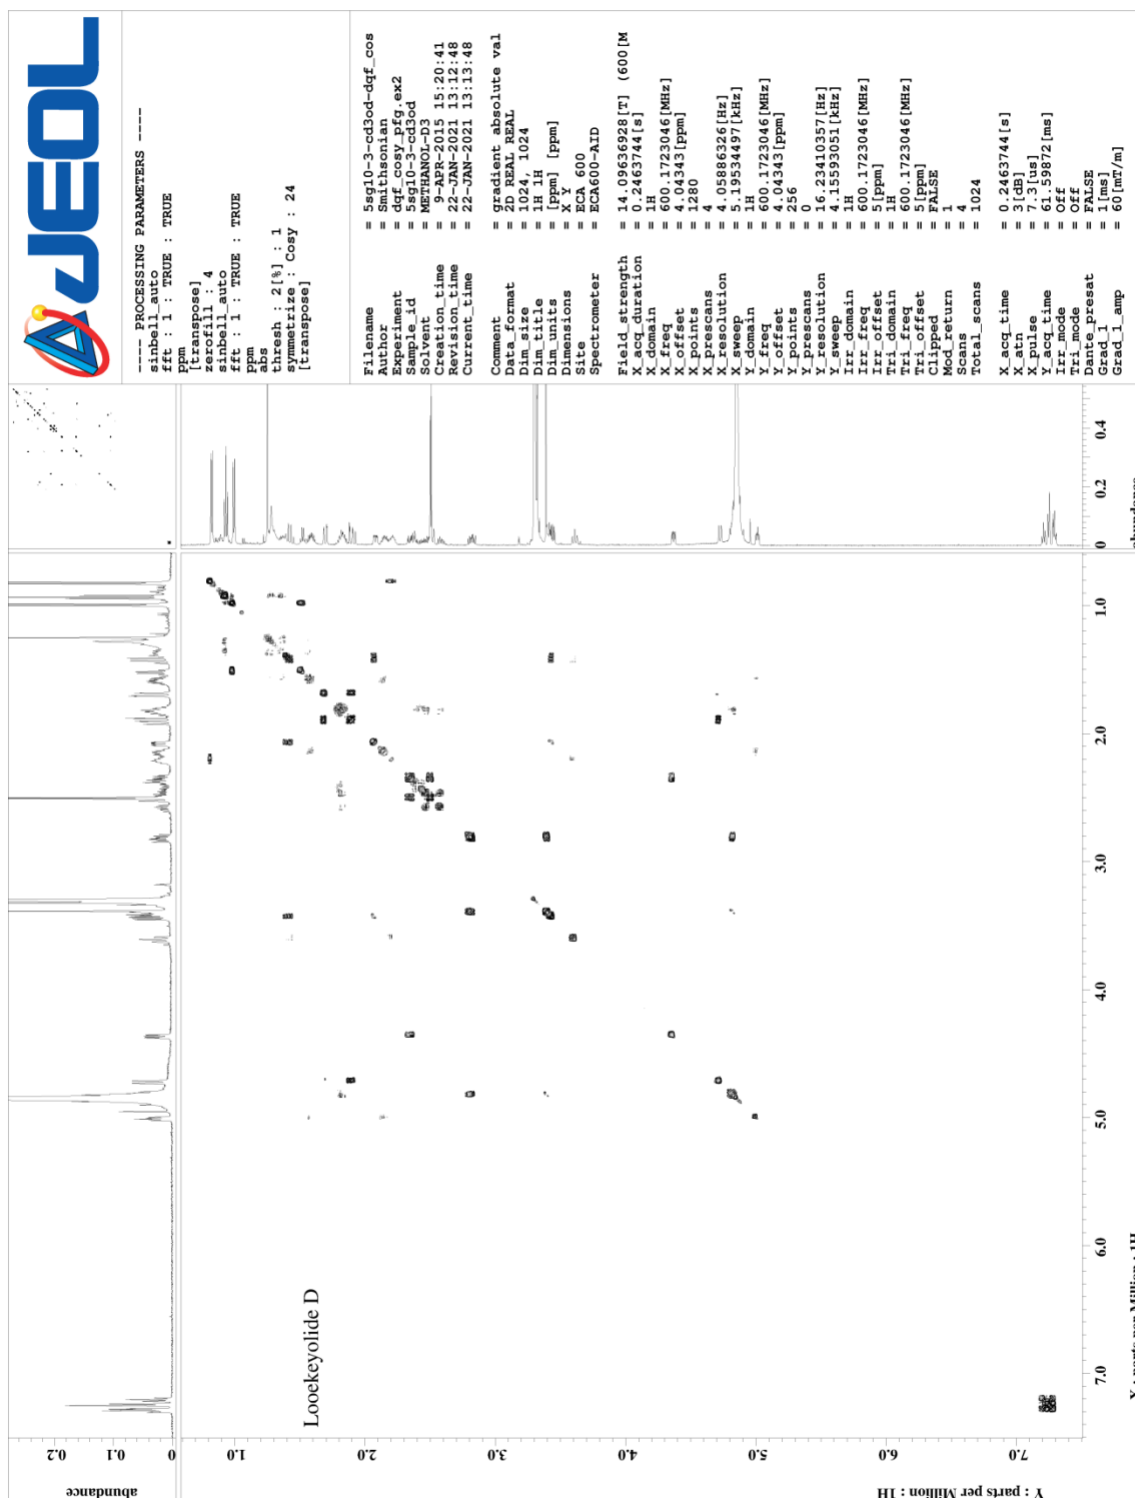

**Figure S8:** HSQC NMR (600 MHz, CD<sub>3</sub>OD) spectrum of looekeyolide D (**4**)

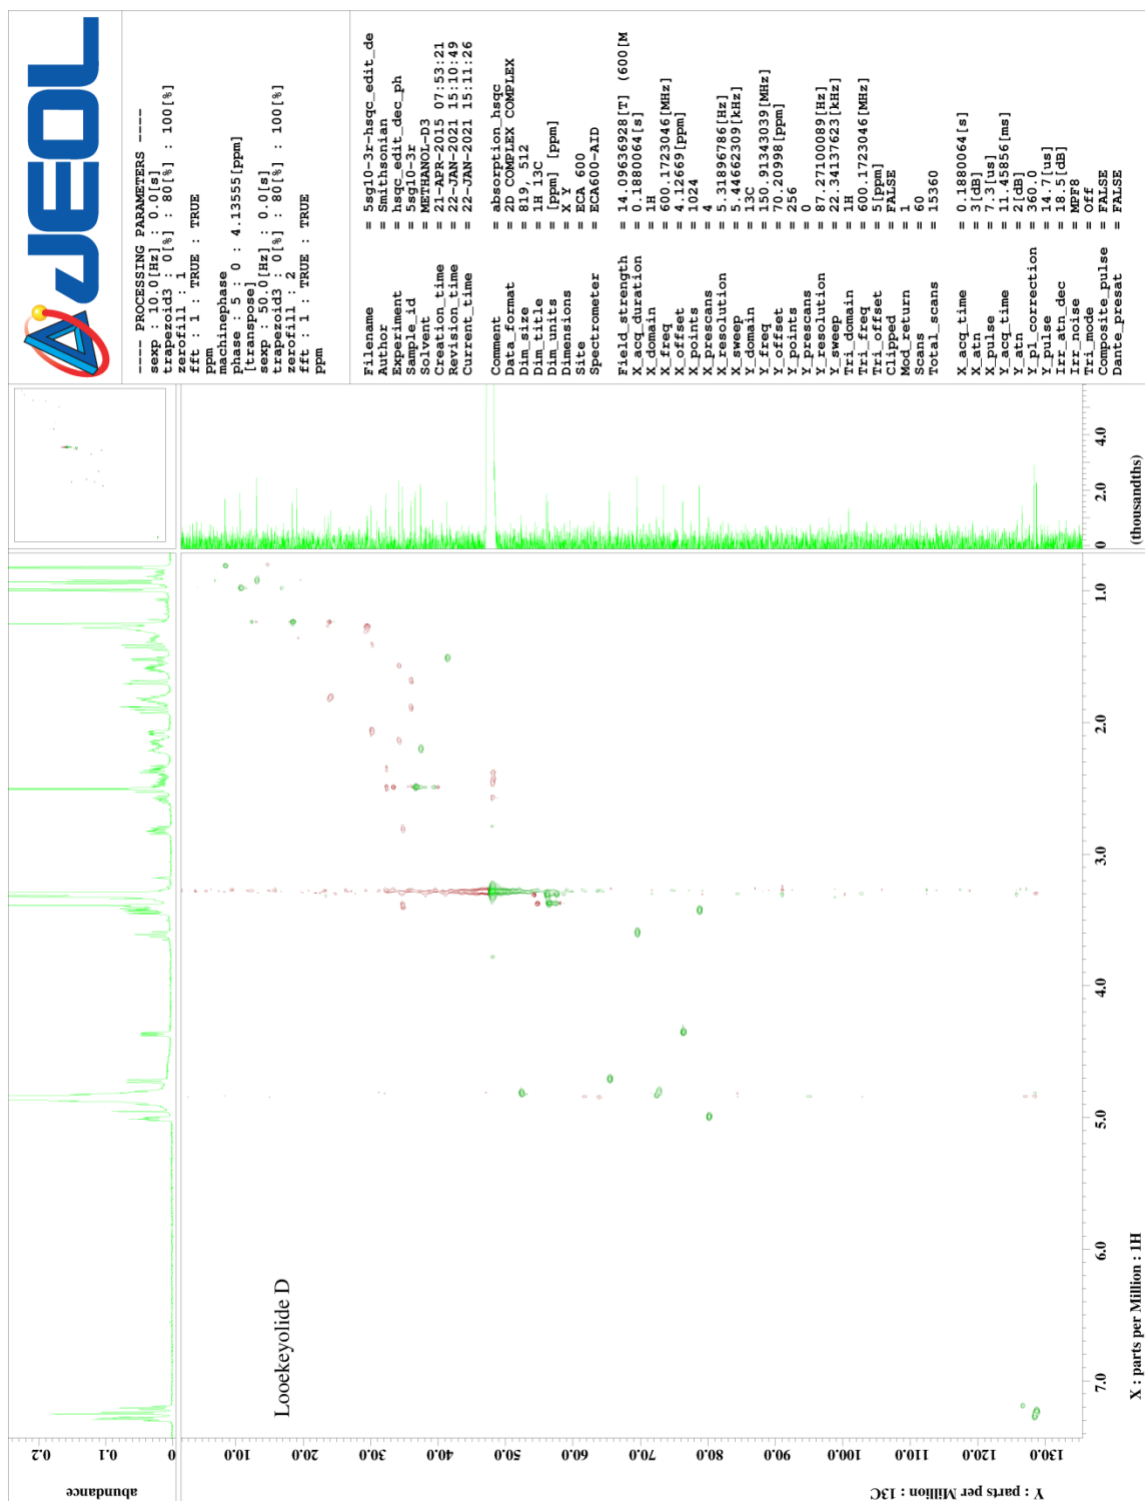

**Figure S9:** HMBC NMR (600 MHz, CD<sub>3</sub>OD) spectrum of looekeyolide D (**4**)

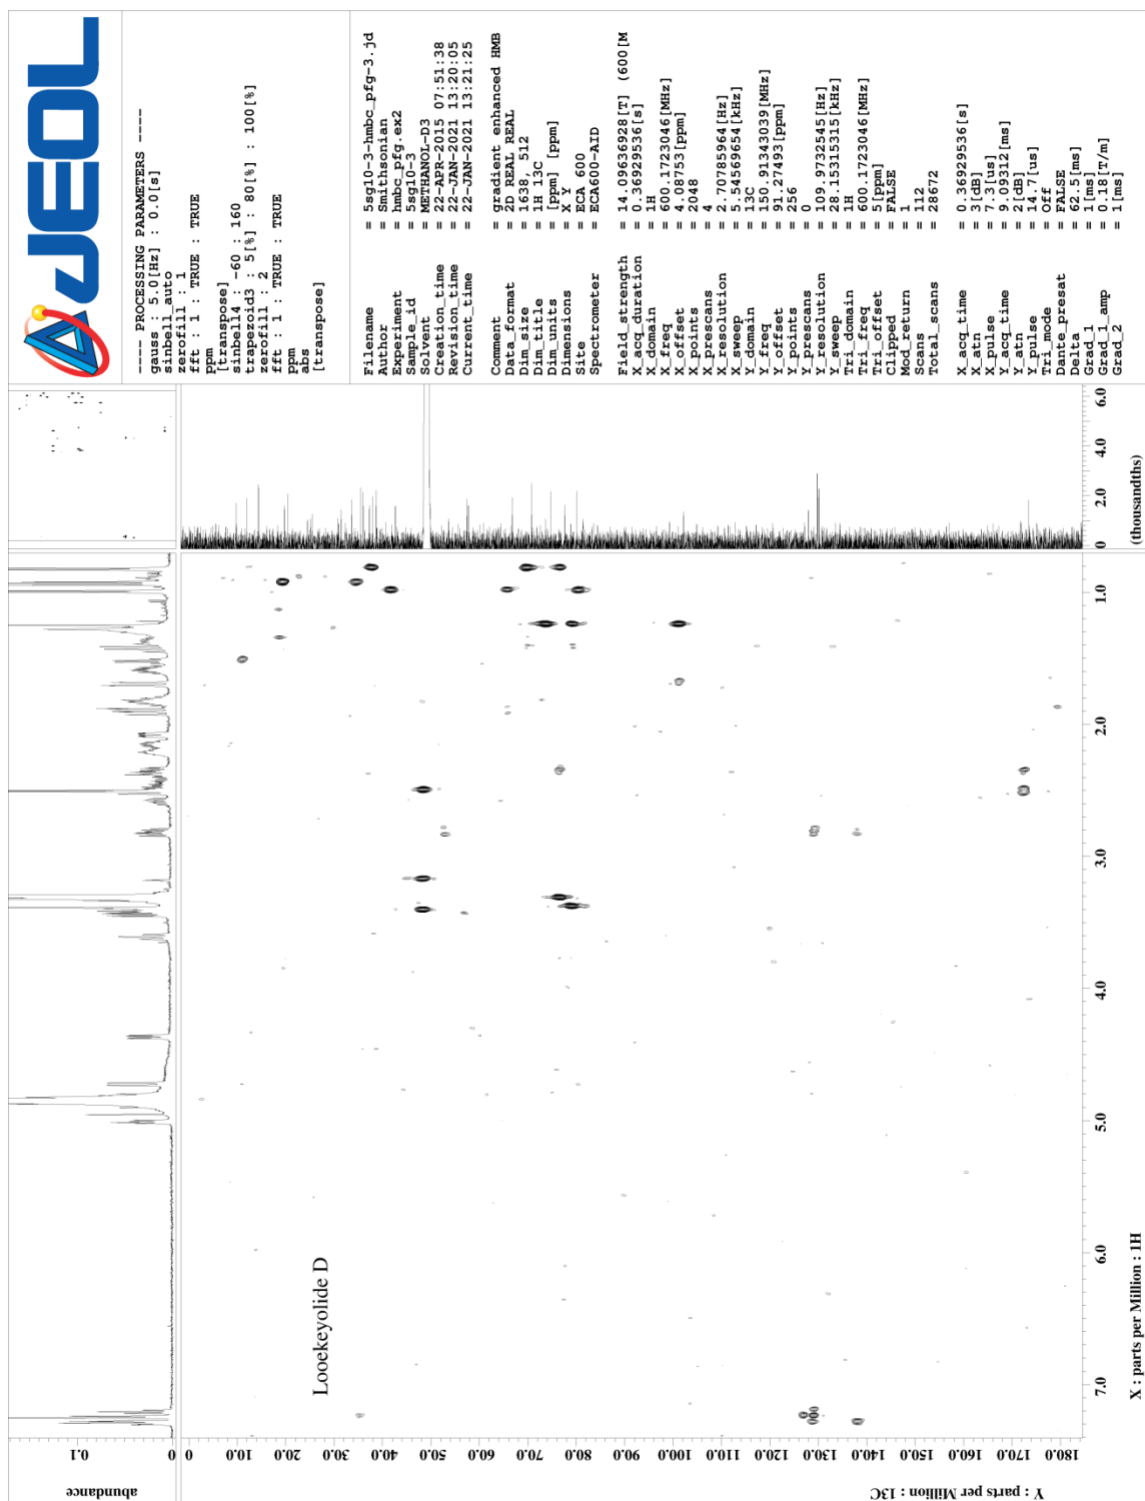

**Figure S10:** 2D-NOESY NMR (600 MHz, CD<sub>3</sub>OD) spectrum of looekeyolide D (4)

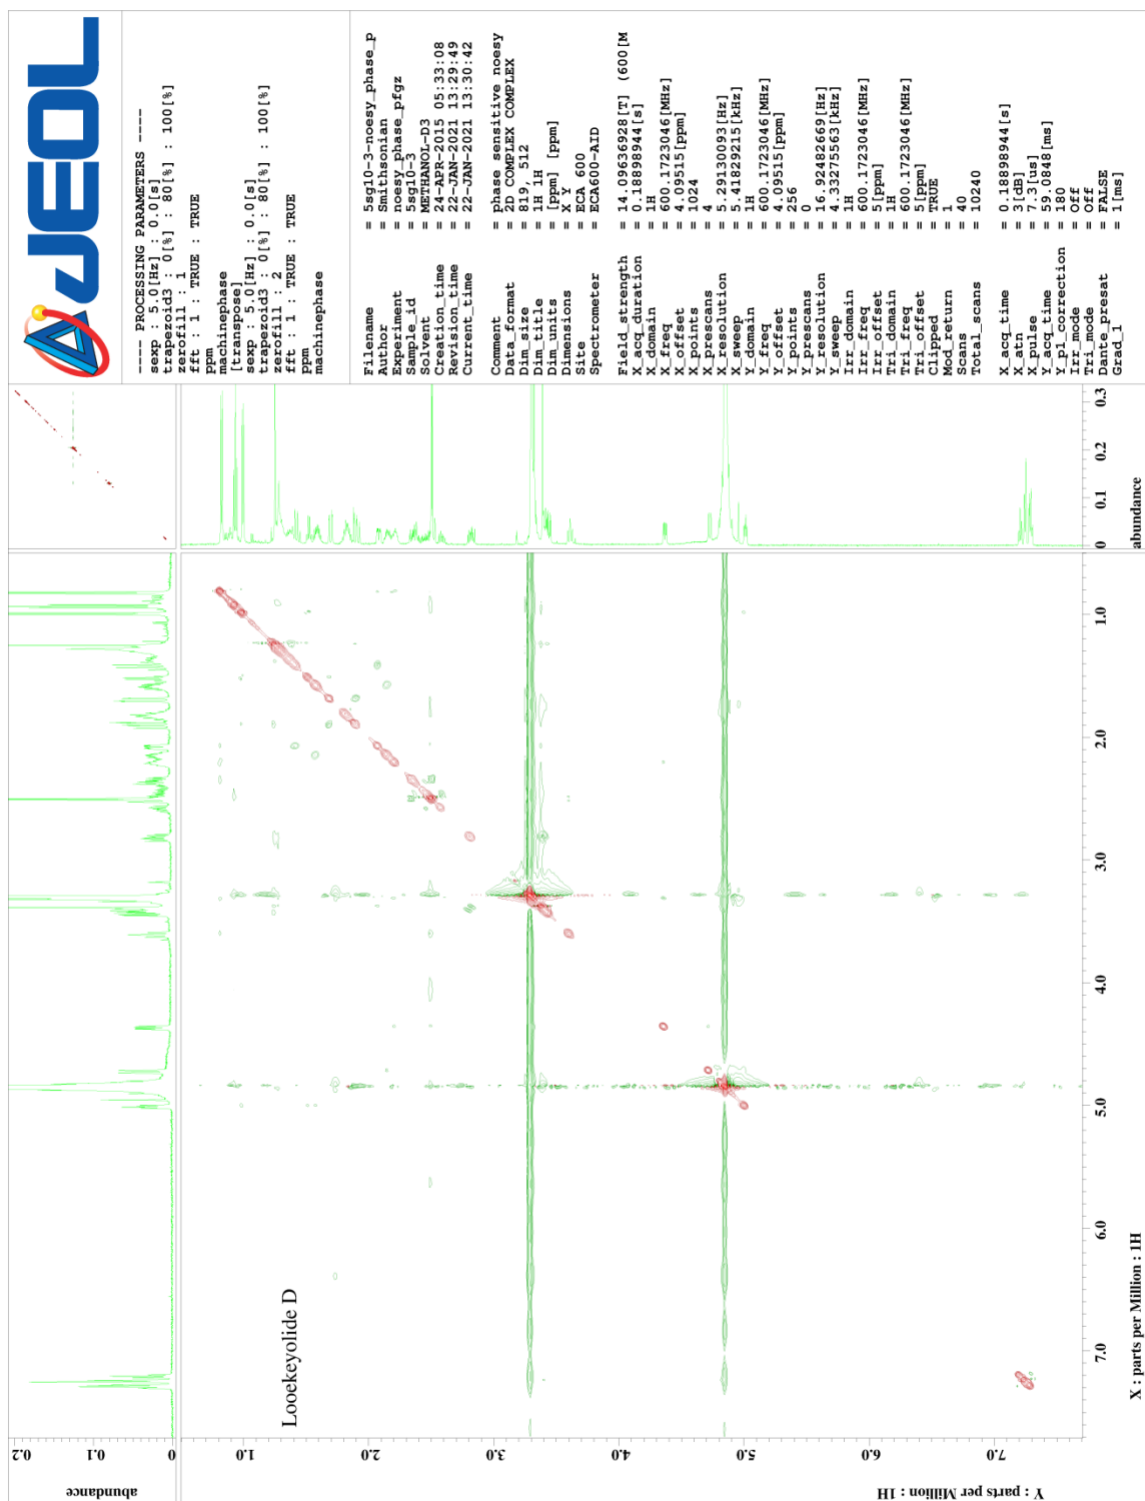

**Table S1. Metadata and sequencing read metrics for V6 amplicon libraries from Black Band Disease cyanobacterial mats from *Siderastrea siderea* corals in Belize**

| SRA accession | Sample | Fraction | Coral | Metagenome Pool | Looekeyolide C/D | Raw reads | Quality-filtered reads |
|---------------|--------|----------|-------|-----------------|------------------|-----------|------------------------|
| SAMN15502381  | SID1   | DNA      | 1     | 1               | nonproducer      | 119,322   | 56,442                 |
| SAMN15502382  | SID1r  | RNA      | 1     | n/a             | nonproducer      | 299,249   | 295,333                |
| SAMN15502383  | SID2   | DNA      | 2     | 1               | nonproducer      | 80,827    | 71,330                 |
| SAMN15502384  | SID2r  | RNA      | 2     | n/a             | nonproducer      | 206,090   | 191,909                |
| SAMN15502385  | SID3   | DNA      | 3     | 1               | nonproducer      | 63,264    | 41,382                 |
| SAMN15502386  | SID3r  | RNA      | 3     | n/a             | nonproducer      | 222,750   | 210,397                |
| SAMN15502387  | SID8m  | DNA      | 8m    | 2               | nonproducer      | 26,671    | 15,743                 |
| SAMN15502388  | SID8mr | RNA      | 8m    | n/a             | nonproducer      | 196,599   | 144,306                |
| SAMN15502389  | SIDa   | DNA      | a     | 2               | nonproducer      | 49,036    | 31,063                 |
| SAMN15502390  | SIDar  | RNA      | a     | n/a             | nonproducer      | 49,329    | 34,400                 |
| SAMN15502391  | SIDE   | DNA      | E     | 2               | nonproducer      | 35,035    | 16,018                 |
| SAMN15502392  | SIDEr  | RNA      | E     | n/a             | nonproducer      | 206,638   | 82,614                 |
| SAMN15502393  | SIDH   | DNA      | H     | 3               | producer         | 75,558    | 46,112                 |
| SAMN15502394  | SIDHr  | RNA      | H     | n/a             | producer         | 249,500   | 119,415                |

|              |       |     |   |     |          |         |         |
|--------------|-------|-----|---|-----|----------|---------|---------|
| SAMN15502395 | SIDI  | DNA | I | 3   | producer | 84,467  | 44,376  |
| SAMN15502396 | SIDIr | RNA | I | n/a | producer | 218,805 | 71,634  |
| SAMN15502397 | SIDL  | DNA | L | 3   | producer | 9,373   | 2,973   |
| SAMN15502398 | SIDLr | RNA | L | n/a | producer | 190,547 | 91,907  |
| SAMN15502399 | SIDO  | DNA | O | 3   | producer | 81,095  | 58,461  |
| SAMN15502400 | SIDOr | RNA | O | n/a | producer | 226,302 | 189,228 |

**Table S2. Metadata and sequencing read metrics for metagenomic libraries from Black Band Disease cyanobacterial mats from *Siderastrea siderea* corals in Belize and Florida**

| SRA Accession | Metagenome Name | Quality-filtered read pairs | Cyanobacterial MAGs                                               | Collection site and date                                                                            |
|---------------|-----------------|-----------------------------|-------------------------------------------------------------------|-----------------------------------------------------------------------------------------------------|
| SAMN15583061  | SID1            | 33,319,838                  | <i>Roseofilum</i> sp. SID1.26                                     | Carrie Bow Cay, Belize, Sept 2015                                                                   |
| SAMN15583062  | SID2            | 26,242,408                  | <i>Roseofilum</i> sp. SID2.16,<br><i>Geitlerinema</i> sp. SID2.20 | Carrie Bow Cay, Belize, Sept 2015                                                                   |
| SAMN15583063  | SID3            | 23,721,563                  | <i>Roseofilum</i> sp. SID3.16                                     | Carrie Bow Cay, Belize, Sept 2015                                                                   |
| SAMN15583059  | SBFL            | 14,889,967                  | <i>Roseofilum</i> sp. SBFL6                                       | offshore reef near Ft. Lauderdale, FL, USA, July 2018                                               |
| SAMN15583058  | SBC             | 32,151,862                  | <i>Geitlerinema</i> sp. SBC9                                      | enrichment culture of cyanobacterial mat from offshore reef near Ft. Lauderdale, FL, USA, July 2018 |
| SAMN15583060  | SBLK            | 13,355,562                  | Spirulinaceae bacterium SBLK1                                     | Looe Key reef, Florida Keys National Marine Sanctuary, FL, USA, July 2017                           |

**Table A3. Quality metrics of metagenome-assembled genomes (MAGs) of A) non-*Roseofilum* cyanobacteria from *Siderastrea siderea*, B) *Roseofilum* from *Siderastrea siderea*, and C) previously published *Roseofilum* strains**

**A) non-*Roseofilum* cyanobacteria from *Siderastrea siderea***

| GenBank Accession      | MAG                             | Completeness | Contamination | Quality     |
|------------------------|---------------------------------|--------------|---------------|-------------|
| <b>JAGHZO000000000</b> | <i>Geitlerinema</i> sp. SBC9    | <b>94.6%</b> | <b>4.5%</b>   | <b>High</b> |
| <b>JAGHZP000000000</b> | <i>Geitlerinema</i> sp. SID2.20 | <b>99.1%</b> | <b>4.7%</b>   | <b>High</b> |
|                        | <i>Spirulinaceae</i> bacterium  |              |               |             |
| <b>JAGHZQ000000000</b> | SBLK1                           | <b>94.6%</b> | <b>5.4%</b>   | <b>High</b> |

**B) *Roseofilum* cyanobacteria from *Siderastrea siderea***

| GenBank Accession      | MAG                           | Completeness | Contamination | Quality     |
|------------------------|-------------------------------|--------------|---------------|-------------|
| <b>JAGHZH000000000</b> | <i>Roseofilum</i> sp. SBFL6   | <b>91.9%</b> | <b>4.5%</b>   | <b>High</b> |
| <b>JAGHZI000000000</b> | <i>Roseofilum</i> sp. SID1.26 | <b>92.5%</b> | <b>4.7%</b>   | <b>High</b> |
| <b>JAGHZJ000000000</b> | <i>Roseofilum</i> sp. SID2.16 | <b>94.3%</b> | <b>3.8%</b>   | <b>High</b> |
| <b>JAGHZK000000000</b> | <i>Roseofilum</i> sp. SID3.16 | <b>93.4%</b> | <b>3.8%</b>   | <b>High</b> |

**C) *Roseofilum* cyanobacteria from other coral species**

| GenBank Accession      | MAG                        | Completeness | Contamination | Quality     |
|------------------------|----------------------------|--------------|---------------|-------------|
| <b>JAGHZL000000000</b> | <i>Roseofilum</i> sp. BLZ4 | <b>92.8%</b> | <b>4.5%</b>   | <b>High</b> |
| <b>JAGHZM000000000</b> | <i>Roseofilum</i> sp. BLZD | <b>91.0%</b> | <b>4.5%</b>   | <b>High</b> |
| <b>JAGHZN000000000</b> | <i>Roseofilum</i> sp. Guam | <b>93.7%</b> | <b>4.5%</b>   | <b>High</b> |
| <b>MLAW000000000</b>   | <i>Roseofilum</i> sp. AO1  | <b>94.6%</b> | <b>5.4%</b>   | <b>High</b> |
| <b>N/A</b>             | <i>Roseofilum</i> sp. Cya2 | <b>94.6%</b> | <b>5.4%</b>   | <b>High</b> |

**Table S4. A) Pairwise Average Nucleotide Identity (ANI) of shared genes among cyanobacterial MAGs from Black Band Disease on *Siderastrea siderea* corals.** Values of 75% or below are too close to the detection limit for confident assessments. Values above this threshold are highlighted in green.

|         | SBC9   | SBFL6  | SBLK1  | SID1.26 | SID2.16 | SID2.20 | SID3.16 |
|---------|--------|--------|--------|---------|---------|---------|---------|
| SBC9    |        |        |        |         |         |         |         |
| SBFL6   | 73.04* |        |        |         |         |         |         |
| SBLK1   | 72.75* | 74.92* |        |         |         |         |         |
| SID1.26 | 73.00* | 99.87  | 75.00* |         |         |         |         |
| SID2.16 | 72.79* | 99.86  | 75.24* | 99.88   |         |         |         |
| SID2.20 | 99.77  | 72.95* | 72.69* | 72.89*  | 72.99*  |         |         |
| SID3.16 | 72.67* | 99.87  | 75.01* | 99.92   | 99.96   | 72.77*  |         |

\* too close to detection limit to be reliable

**Table S4. B) Pairwise Average Nucleotide Identity (ANI) of shared genes among *Roseofilum* MAGs from Black Band Disease on multiple coral species**

|         | SBFL6 | SID1.26 | SID2.16 | SID3.16 | BLZ4  | BLZD  | Guam  | AO1   | Cya2 |
|---------|-------|---------|---------|---------|-------|-------|-------|-------|------|
| SBFL6   |       |         |         |         |       |       |       |       |      |
| SID1.26 | 99.87 |         |         |         |       |       |       |       |      |
| SID2.16 | 99.86 | 99.88   |         |         |       |       |       |       |      |
| SID3.16 | 99.87 | 99.92   | 99.96   |         |       |       |       |       |      |
| BLZ4    | 98.22 | 98.24   | 98.26   | 98.25   |       |       |       |       |      |
| BLZD    | 98.23 | 98.25   | 98.26   | 98.26   | 99.78 |       |       |       |      |
| Guam    | 94.64 | 94.63   | 94.61   | 94.65   | 94.68 | 94.62 |       |       |      |
| AO1     | 94.52 | 94.55   | 94.53   | 94.57   | 94.57 | 94.52 | 98.09 |       |      |
| Cya2    | 94.47 | 94.25   | 94.51   | 94.55   | 94.59 | 94.6  | 97.56 | 97.38 |      |

**Table S5. Specificity codes for adenylation (A) domains of two NRPSs for the biosynthesis of Lk-A/B and Lk-C/D.**

| A Domain          | 235 | 236 | 239 | 278 | 299 | 301 | 322 | 330 | 331 | 517 | Specificity     |
|-------------------|-----|-----|-----|-----|-----|-----|-----|-----|-----|-----|-----------------|
| LklG_A            | G   | L   | F   | W   | I   | G   | A   | S   | G   | K   | 2-ketoacid      |
| LklG_A*           | G   | L   | F   | W   | I   | G   | A   | S   | G   | K   | 2-ketoacid      |
| LkII_A            | D   | A   | W   | F   | L   | G   | N   | V   | V   | K   | L-Leucine       |
| LkII(F)_A         | D   | A   | W   | T   | I   | A   | A   | V   | C   | K   | L-Phenylalanine |
| GrsA <sup>#</sup> | D   | A   | W   | T   | I   | A   | A   | I   | C   | K   | L-Phenylalanine |

\* LklG-A from the gene cluster from Lk-C; <sup>#</sup> GrsA: gramicidin S synthase 1.

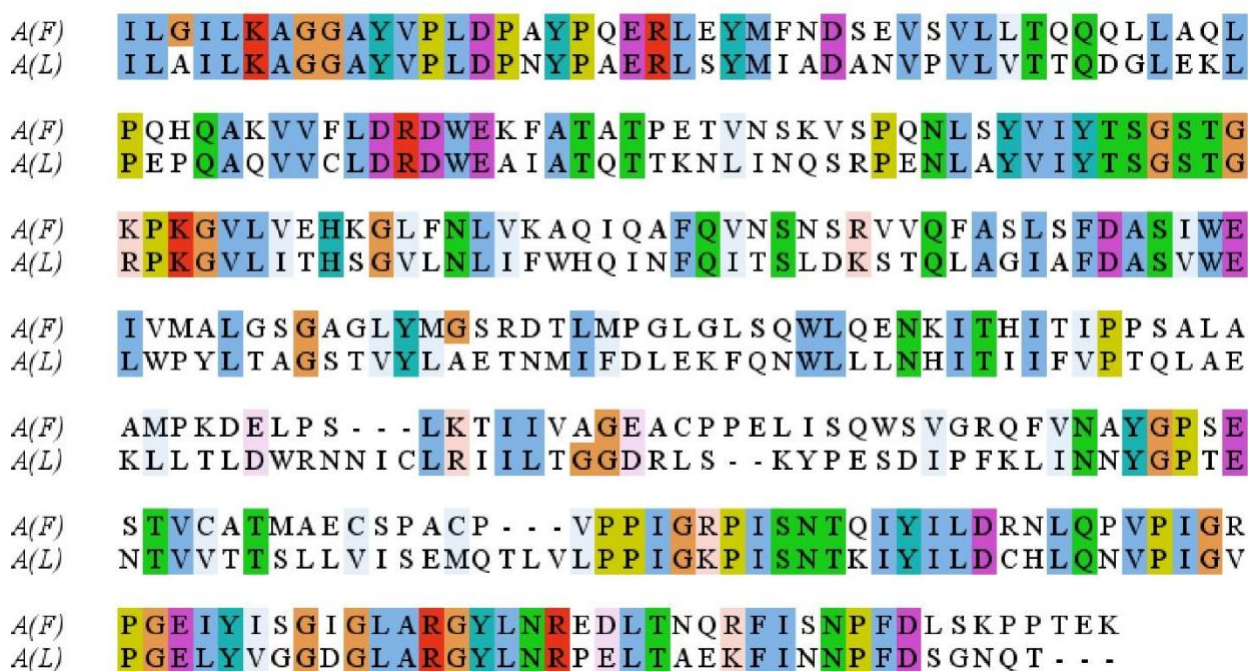

**Figure S11. Alignment of A domains of LkII and LkII(F) by ClustalW<sup>1</sup>.** These two domains showed 46% amino acid identities, significantly lower than other domains of LkII and LkII(F). The alignment figure was created using Jalview<sup>2</sup>.

<sup>1</sup>Cluster W: Nucleic Acids Res. 1994 Nov 11; 22(22): 4673–4680.

<sup>2</sup>Jalview: Waterhouse, A.M., Procter, J.B., Martin, D.M.A, Clamp, M. and Barton, G. J. (2009) "Jalview Version 2 - a multiple sequence alignment editor and analysis workbench" Bioinformatics 25 (9) 1189-1191 doi: 10.1093/bioinformatics/btp033

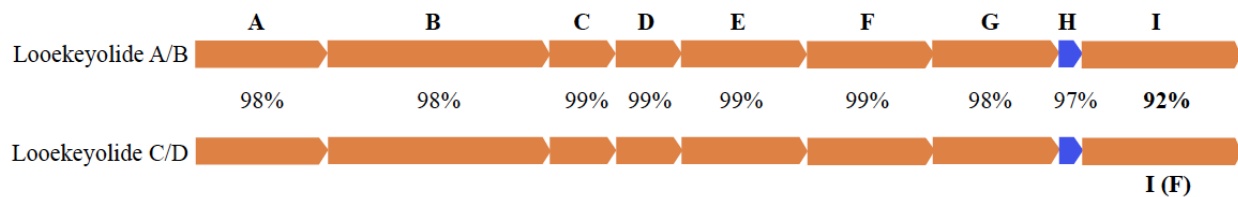

**Figure S12. Comparison of gene similarities in the biosynthetic gene clusters for looekeyolide A/B and looekeyolide C/D.** The two clusters for the biosynthesis of Lk-A/B (top) and Lk-C/D (bottom) show at least 97% amino acid identities, except the last NRPS. LklI shares a 92% amino acid identity with LKII (F) and the identity deviation originates from the low identity (46%) of their A domains.

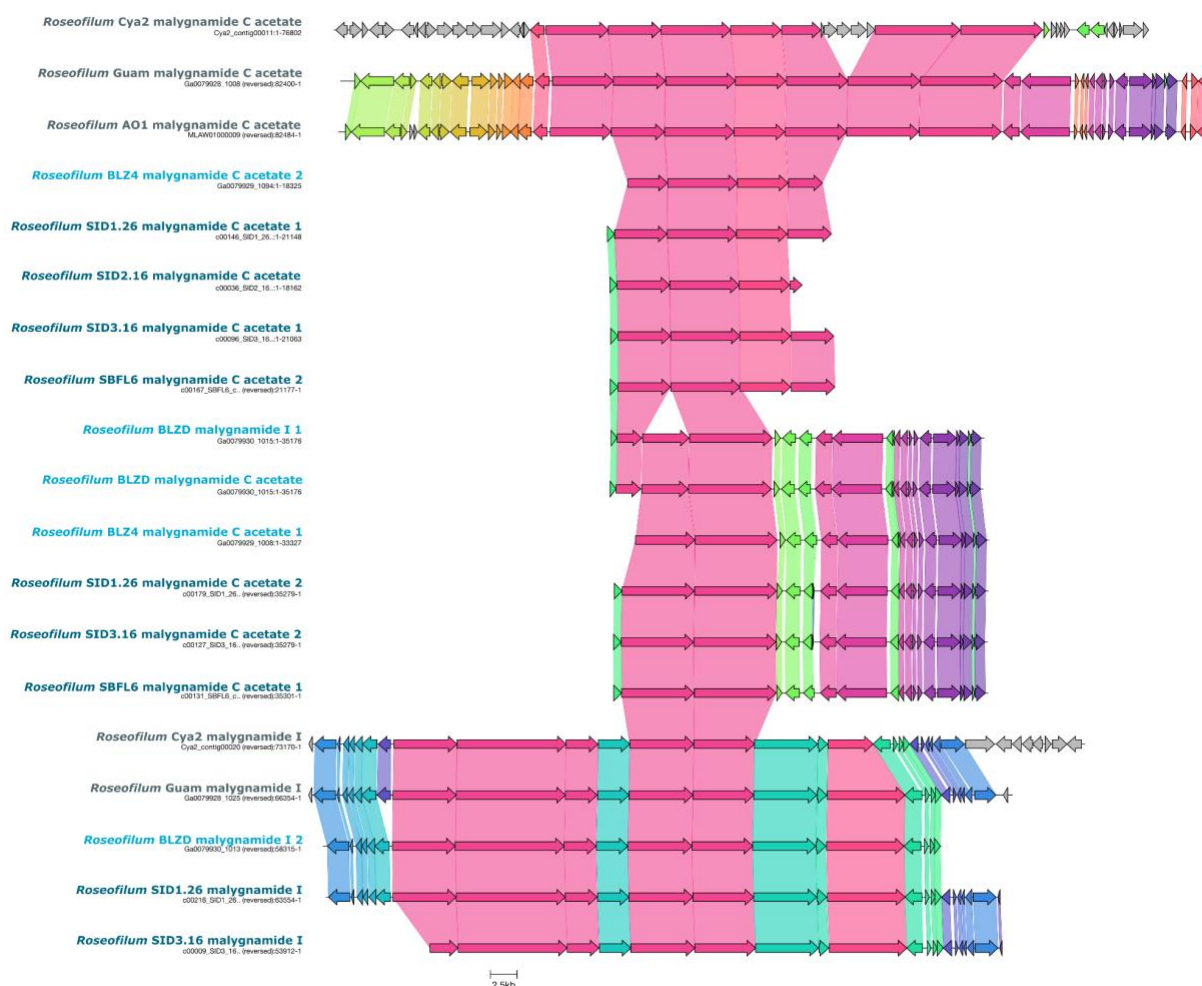

**Figure S13. Biosynthetic gene clusters for malyngamides in *Roseofilum* MAGs.** Biosynthetic gene clusters were annotated as malyngamide C acetate and malyngamide I by antiSMASH v 6.0. MAG names are colored by whole-genome clustering (as in Figures 2 and 3) where Caribbean *Roseofilum* from *Siderastrea* corals are dark blue, Caribbean *Roseofilum* from other coral species are light blue, and Pacific *Roseofilum* are dark grey.
